# Supplementary material
Source: PubMed Central journal article supplement (PMC4558612)
Supplement: ac5b01450_si_001.pdf [file ac5b01450_si_001.pdf]

## **SUPPORTING INFORMATION (SI)**

### **Analysis of a common cold virus and its subviral particles by gas-phase electrophoretic mobility molecular analysis and native mass spectrometry**

**Victor U. Weiss**<sup>1</sup>

**Jessica Z. Bereszczak**<sup>2</sup>

**Marlene Havlik**<sup>1</sup>

**Peter Kallinger**<sup>3</sup>

**Irene Gössler**<sup>4</sup>

**Mohit Kumar**<sup>4</sup>

**Dieter Blaas**<sup>4</sup>

**Martina Marchetti-Deschmann**<sup>1</sup>

**Albert J. R. Heck**<sup>2</sup>

**Wladyslaw W. Szymanski**<sup>3</sup>

**Günter Allmaier**<sup>1</sup>

<sup>1</sup> Institute of Chemical Technologies and Analytics, TU Wien, Vienna, Austria

<sup>2</sup> Bijvoet Center for Biomolecular Research and Utrecht Institute of Pharmaceutical Sciences, Utrecht University, Utrecht, The Netherlands

<sup>3</sup> University of Vienna, Faculty of Physics, Vienna, Austria

<sup>4</sup> Max F. Perutz Laboratories, Department of Medical Biochemistry, Medical University of Vienna, Vienna Biocenter (VBC), Vienna, Austria

This SI file contains additional information on chemicals and reagents, instrumentation and sample preparation. Additionally, GEMMA spectra obtained with various GEMMA device generations using comparable samples are shown (Figure S1). Data as employed for setup of a  $M_r$  / EM diameter correlation ( $\text{corr}_{\text{new}}$ ) as presented in Figure 6 is given (Figure S3).

## Additional information on materials and methods

**Chemicals and reagents.** Boric acid (analytical grade, *pro analysis*, *pa*) was obtained from Fluka (Steinheim, Germany). Dimethylsulfoxide (DMSO,  $\geq 99.9\%$ ), benzoic ( $\geq 99.9\%$ ), trifluoroacetic (TFA,  $\geq 99.5\%$ ) and sinapic acid (*pa*) were purchased from Fluka (Buchs, Switzerland). Ammonium acetate ( $\geq 99.99\%$ ) and ammonium hydroxide (28.2 % ammonia in water) were from Sigma Aldrich (St. Louis, MO, USA). Sodium hydroxide ( $\geq 99\%$ ) and acetonitrile (ACN, ACS reagent) were purchased from Merck (Darmstadt, Germany). Sodium dodecyl sulfate (SDS,  $\geq 95\%$ ) was obtained from J. T. Baker (Avantor Performance Materials, Center Valley, PA, USA). Water was of Millipore grade (18.2 M $\Omega$ cm resistivity at 25°C). Ovalbumin (grade VI, approx. 99%), catalase (bovine liver, aqueous solution) and bovine serum albumin (BSA,  $\geq 96\%$ ) were from Sigma Aldrich and thyroglobulin (from bovine thyroid glands  $\geq 90\%$ ) from Calbiochem (Darmstadt, Germany). Several derivatives of keyhole limpet hemocyanin (KLH, Stellar Biotechnologies, Port Hueneme, CA, USA) (approx. 10 mg/mL in sodium phosphate, 10 to 20 mM, pH 6.7 to 7.2) were used.

**Instrumentation.** CE was on an Agilent 3D CE instrument (Agilent Technologies, Waldbronn, Germany) equipped with a 50  $\mu$ m inner / 375  $\mu$ m outer diameter fused silica capillary ( $L_{\text{tot}} / L_{\text{eff}} = 60.0 / 51.5$  cm from Polymicro, Phoenix, AZ, USA) at 20 °C. 25 kV separation voltage (42 kV/m field strength) were applied. Sample injection was for 9 s at 50 mbar, detection at 200 nm and 260 nm by UV absorbance, respectively. The capillary was pre- / post-conditioned via flushing with BGE / sodium hydroxide solution (1 M) and Millipore grade water. TEM measurements were on a FEI Morgagni 268D electron microscope (FEI Tecnai, Eindhoven, The Netherlands). GEMMA measurements were on a commercial available TSI Inc (Shoreview, MN, USA) instrument consisting of (i) a nano ES aerosol generator (model 3480) including a  $^{210}\text{Po}$  charge reduction device, (ii) an electrostatic

classifier (series 3080) with a nano DMA and (iii) an ultrafine, n-butanol driven CPC (model 3025 A). Alternatively, a custom-built nano DMA with 50 Lpm sheath flow (Tapcon & Analysensysteme, Salzburg, Austria) and a water driven CPC (TSI Inc, model 3786) were employed <sup>11</sup>. We used 25  $\mu\text{m}$  as well as 40  $\mu\text{m}$  cone-tipped fused silica capillaries (TSI Inc) for analysis. Other settings are described in supplementary Figure S-2. GEMMA spectra were calculated as median value from at least  $n = 7$  individual measurements. For data evaluation, single Gauss peaks were fitted to corresponding spectra via OriginPro (8 SR0, v8.0724, OriginLab Corporation, Northampton, MA, USA) and the peak apex taken as EM diameter value. EM diameter values of protein mono- and dimers were taken for setup of a  $M_r$  / EM diameter correlation.

In native mass spectrometry experiments the capillary and cone voltages were kept constant at 1.25 kV and 150 V, respectively. For native MS analysis the voltage before the collision cell (collision energy) was 150 V for intact HRV-A2 and 180 V for empty HRV-A2 capsids. Ions were introduced into the source at a pressure of 10 mbar. Collision-induced dissociation (CID, tandem MS) analysis was carried out without precursor ion isolation and the collision energy varied from 0-400 V with CID spectra recorded at incremental increases of 50 V. The signal intensity of the released VP subunits was measured relative to the signal intensity of the undissociated virus to allow for estimation of the relative intensities of the dissociated subunits. ESI tips were prepared in-house from borosilicate glass tubes of 1.2 mm (outer diameter) and inner diameter of 0.68 mm (World Precision Instruments, Sarasota, FL, USA) using a P-97 micropipette puller (Sutter Instruments, Novato, CA, USA). The ESI tips were gold coated using a Scancoat six Pirani 501 sputter coater (Edwards Laboratories, Milpitas, CA, USA).

**Sample preparation.** For experiments targeting the lipase sensitivity of the virus contaminant, samples included 1.8 nM desalted HRV-A2 (obtained by the conventional preparation protocol) and 0.01  $\mu$ M thyroglobulin (as internal standard) in 50 mM  $\text{NH}_4\text{OAc}$  (pH 8.4). The sample was subjected to lipase digestion by overnight incubation at 28°C and gentle mixing at 650 rpm in an Eppendorf Thermomixer, at a final enzyme concentration of 0.03 U/ $\mu$ L prior to addition of thyroglobulin. For comparison of the HRV-A2 preparation methods, GEMMA samples were adjusted to 0.5 nM HRV-A2 in 50 mM  $\text{NH}_4\text{OAc}$  (pH 8.4); an internal standard was omitted. For measurements with a custom-built instrument, the samples included 2.4 nM HRV-A2 and 0.03  $\mu$ M thyroglobulin in 10 mM  $\text{NH}_4\text{OAc}$  at pH 9.5. Virus conversion into empty capsids was triggered by heating to 56°C (9 and 15 min, respectively, to also obtain various amounts of A-particles) in an Eppendorf Thermomixer. The KLH derivates (in phosphate buffer) were diluted with  $\text{NH}_4\text{OAc}$  (25 mM, pH 7.4) to result in final phosphate concentrations of 33  $\mu$ M, 20  $\mu$ M, 14  $\mu$ M to assess an impact of insoluble buffer components on the EM diameter determination via GEMMA. BSA, ovalbumin, catalase and thyroglobulin (all at  $\sim$ 1  $\mu$ M) were dissolved in  $\text{NH}_4\text{OAc}$  (25 mM, pH 7.4).

For CE analysis, the corresponding HRV-A2 samples were diluted 1:20 (v/v) in BGE. Samples included DMSO diluted 1:4,000 (v/v) as marker for the electroosmotic flow and 0.15 mM benzoic acid as internal standard. Because of SDS, heating for 10 min to 56°C lead to dissociation of the virus into its components.

Samples for TEM were prepared as the samples for the respective GEMMA measurements but without thyroglobulin.

Native MS analysis was carried out with HRV-A2 as obtained after desalting (16 nM virus in 10 mM  $\text{NH}_4\text{OAc}$ , pH 9.5). For analysis of empty capsids, an aliquot was incubated at 56°C for 10 min (final concentration 8 nM B-particles in 10 mM  $\text{NH}_4\text{OAc}$ , pH 9.5).

For MALDI MS measurements, samples were diluted 1:3 and 1:10 (v/v) in aqueous 0.1 % TFA, respectively. Subsequently, 3  $\mu$ L of each diluted sample was mixed with 3  $\mu$ L of matrix and 1  $\mu$ L of the respective mixture was applied to the MALDI target and dried at RT.

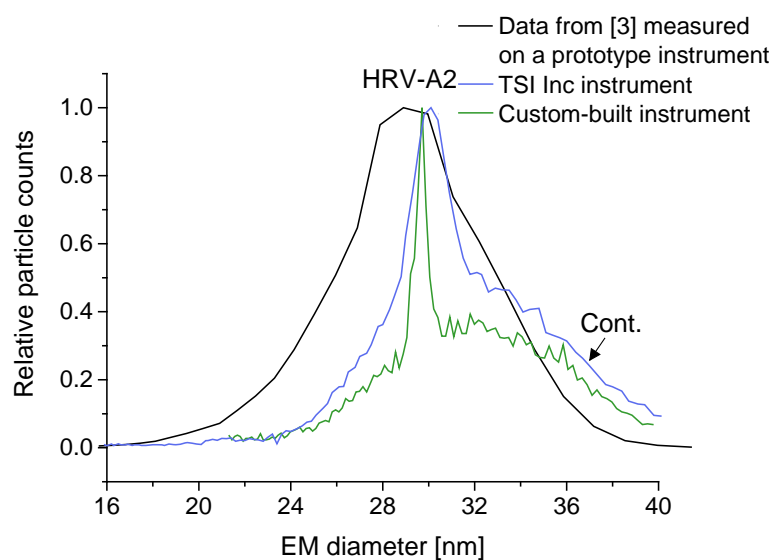

Figure S-1: Comparison of GEMMA signals obtained for a sample of native HRV-A2 on instruments of various generations. It is of note that the increasing resolution between first measurements and measurements carried out later on a conventional instrument allowed for discrimination of peaks corresponding to intact virions and a contamination of HRV-A2 preparations. The resolution (in terms of peak broadness) is substantially improved on a custom-built instrument.

|                                          | TSI Inc instrument | Custom-built instrument |
|------------------------------------------|--------------------|-------------------------|
| Voltage for sample injection             | 2 kV               | -2.0 kV                 |
| Current for sample injection             | -400 nA            | 200 nA                  |
| Pressure difference for sample injection | 0.30 bar           | 0.25 bar                |
| Sheath flow at the capillary tip         | 1 Lpm              | 1.1 Lpm                 |
| Sheath flow in the DMA                   | 15 Lpm             | 50 Lpm                  |

Figure S-2: Instrumental settings for GEMMA analyses. Approximate values are given.

| Analyte                | EM diameter [nm], average | EM diameter [nm], STDEV | Number of measurements | Reference for EM diameter determination | M <sub>r</sub> [kDa], average | M <sub>r</sub> [kDa], STDEV | Number of measurements | Reference for M <sub>r</sub> determination |
|------------------------|---------------------------|-------------------------|------------------------|-----------------------------------------|-------------------------------|-----------------------------|------------------------|--------------------------------------------|
| Fab 3120, monomer      | 6.319                     | 0.030                   | n = 6                  | -                                       | 47.964                        | 0.09                        | n = 5                  | [22]                                       |
| Fab 3120, dimer        | 7.916                     | 0.029                   | n = 4                  | -                                       | -                             | -                           | -                      | -                                          |
| Ovalbumin, monomer     | 6.117                     | 0.062                   | n = 4                  | -                                       | 44.287                        | -                           | -                      | A2512 (Sigma)                              |
| Ovalbumin, dimer       | 7.734                     | 0.051                   | n = 4                  | -                                       | -                             | -                           | -                      | -                                          |
| Catalase, monomer      | 10.572                    | 0.048                   | n = 4                  | -                                       | ~ 250                         | -                           | -                      | C3155 (Sigma)                              |
| Catalase, dimer        | 13.602                    | 0.040                   | n = 4                  | -                                       | -                             | -                           | -                      | -                                          |
| Thyroglobulin, monomer | 15.037                    | 0.023                   | n = 4                  | -                                       | ~ 660                         | -                           | -                      | 609310 (Calbiochem)                        |
| Thyroglobulin, dimer   | 18.572                    | 0.040                   | n = 4                  | -                                       | -                             | -                           | -                      | -                                          |
| BSA, monomer           | 7.005                     | 0.019                   | n = 4                  | -                                       | ~ 66                          | -                           | -                      | A8022 (Sigma)                              |
| BSA, dimer             | 8.884                     | 0.045                   | n = 4                  | -                                       | -                             | -                           | -                      | -                                          |
| KLH derivat 1, monomer | 13.228                    | 0.149                   | n = 3                  | -                                       | 448.9                         | 1.7                         | n = 4                  | -                                          |
| KLH derivat 1, dimer   | 16.456                    | 0.137                   | n = 3                  | -                                       | -                             | -                           | -                      | -                                          |
| KLH derivat 2, monomer | 13.536                    | 0.261                   | n = 3                  | -                                       | 464.8                         | 1.5                         | n = 5                  | -                                          |
| KLH derivat 2, dimer   | 17.065                    | 0.211                   | n = 3                  | -                                       | -                             | -                           | -                      | -                                          |
| KLH derivat 3, monomer | 13.226                    | 0.141                   | n = 3                  | -                                       | 419.7                         | 0.8                         | n = 6                  | -                                          |
| KLH derivat 3, dimer   | 16.371                    | 0.154                   | n = 3                  | -                                       | -                             | -                           | -                      | -                                          |
| KLH derivat 4, monomer | 12.747                    | 0.151                   | n = 3                  | -                                       | 403.6                         | 7.6                         | n = 5                  | -                                          |
| KLH derivat 4, dimer   | 16.221                    | 0.192                   | n = 3                  | -                                       | -                             | -                           | -                      | -                                          |
| HRV-A2 150S            | 29.865                    | 0.416                   | n = 6                  | -                                       | na                            | na                          | na                     | na                                         |
| MS2                    | 23.931                    | 0.651                   | n = 8                  | [10, 11, 44, 45, 47 - 50]               | 3600                          | -                           | -                      | [46]                                       |
| RYMV                   | 28.250                    | 0.354                   | n = 2                  | [10, 47]                                | 6500                          | -                           | -                      | [51]                                       |

Figure S-3: Data employed for setup of a M<sub>r</sub> / EM diameter correlation (corr<sub>new</sub>) as presented in Figure 6. The M<sub>r</sub>s of KLH derivates were obtained via MALDI linear time-of-flight MS.
